# Supplementary material for: FGFR1 is an adverse outcome indicator for luminal A breast cancers
Source: PubMed Central journal article supplement (PMC4826266; doi:10.18632/oncotarget.6563), 2015-12-11
Supplement: oncotarget-07-5063-s001.pdf [file oncotarget-07-5063-s001.pdf]

## FGFR1 is an adverse outcome indicator for luminal A breast cancers

### Supplementary Materials

**Supplementary Table S1: Antibodies used for IHC analysis**

| Markers    | Company             | Clone     | Dilution    | Antigen retrieval | Incubation condition (min, °C) | Assessment | Cutoff |
|------------|---------------------|-----------|-------------|-------------------|--------------------------------|------------|--------|
| ER         | Neomarkers          | SP1       | Pre-diluted | EDTA pH8          | 32,37                          | N          | 1%     |
| PR         | Ventana             | IE2       | Pre-diluted | EDTA pH8          | 32,37                          | N          | 20%    |
| Ki67       | Ventana             | 41912     | Pre-diluted | EDTA pH8          | 32,37                          | N          | 20%    |
| EGFR       | Ventana             | 3C6       | Pre-diluted | EDTA pH8          | 32,37                          | M          | 5%     |
| HER2       | Ventana             | 4B5       | Pre-diluted | EDTA pH8          | 16,37                          | M          | 3+     |
| CK5/6      | Dako                | D5/16 B4  | 1:40        | EDTA pH8          | 32,37                          | C,M        | 5%     |
| CK14       | Neomarkers          | LL002     | 1:100       | EDTA pH8          | 32,37                          | C,M        | 5%     |
| c-kit      | Dako                | 104D2     | 1:300       | EDTA pH8          | 32,37                          | C,M        | 5%     |
| P63        | Ventana             | 4A4       | Pre-diluted | EDTA pH8          | 32,37                          | N          | 5%     |
| SYN        | Novocastra          | 27G12     | 1:50        | EDTA pH8          | 32,37                          | C,M        | 1%     |
| CG         | Biogene             | MU-126-UC | 1:200       | EDTA pH8          | 32,37                          | C,M        | 1%     |
| SOX2       | Ventana             | SP76      | Pre-diluted | EDTA pH8          | 32,37                          | N          | 1%     |
| p-cadherin | BD transduction lab | 56/p-cad  | 1:200       | EDTA pH8          | 32,37                          | C,M        | 10%    |
| FGFR1      | Ventana             | D8E4      | 1:200       | EDTA pH8          | 32, 37                         | C, M       | 1%     |

'N': nuclear; 'C': cytoplasmic; 'M': membranous.

**Supplementary Table S2: Association of FGFR1 expression of clinic-pathological features and biomarkers expression in luminal cancers**

| Clinico-pathological features | FGFR1 (%) |            |           |                 |              |
|-------------------------------|-----------|------------|-----------|-----------------|--------------|
|                               | Negative  | Positive   | Total     | <i>p</i> -value |              |
| Grade                         | 1         | 135 (89.4) | 16 (10.6) | 151             | <b>0.005</b> |
|                               | 2         | 328 (84.8) | 59 (15.2) | 387             |              |
|                               | 3         | 227 (79.4) | 59 (20.6) | 286             |              |
| FF                            | Absence   | 509 (85.1) | 89 (14.9) | 598             | <b>0.086</b> |
|                               | Presence  | 165 (80.5) | 40 (19.5) | 205             |              |
| LVI                           | Absence   | 482 (85.8) | 80 (14.2) | 562             | <b>0.031</b> |
|                               | Presence  | 174 (79.5) | 45 (20.5) | 219             |              |
| pN                            | 0         | 364 (86.9) | 55 (13.1) | 419             | <b>0.004</b> |
|                               | 1         | 194 (81.5) | 44 (18.5) | 238             |              |
|                               | 2         | 80 (84.2)  | 15 (15.8) | 95              |              |
|                               | 3         | 41 (70.7)  | 17 (29.3) | 58              |              |

|                  |       |            |            |       |                   |
|------------------|-------|------------|------------|-------|-------------------|
| pT               | 1     | 309 (87.5) | 44 (12.5)  | 353   | <b>0.001</b>      |
|                  | 2     | 332 (81.0) | 78 (19.0)  | 410   |                   |
|                  | 3     | 27 (77.1)  | 8 (22.9)   | 35    |                   |
|                  | 4     | 6 (60.0)   | 4 (40.0)   | 10    |                   |
| Molecular        | Lum A | 454 (89.0) | 56 (11.0)  | 510   | <b>&lt; 0.001</b> |
|                  | Lum B | 238 (75.1) | 79 (24.9)  | 317   |                   |
| Age              | Mean  | 54.9       | 52.8       | 54.5  | 0.113             |
|                  | SD    | 12.88      | 12.15      | 12.78 |                   |
|                  | Range | 22-97      | 28-91      |       |                   |
| Tumor size       | Mean  | 2.52       | 2.93       | 2.59  | <b>0.001</b>      |
|                  | SD    | 1.468      | 1.581      | 1.494 |                   |
|                  | Range | 0.2-13.9   | 0.3-9.5    |       |                   |
| <b>Biomarker</b> |       |            |            |       |                   |
| ER               | Neg   | 53 (88.3)  | 7 (11.7)   | 60    | 0.311             |
|                  | Pos   | 639 (83.3) | 128 (16.7) | 767   |                   |
| PR               | < 20% | 165 (77.1) | 49 (22.9)  | 214   | 0.003             |
|                  | ≥ 20% | 523 (85.8) | 86 (14.2)  | 609   |                   |
| HER2             | Neg   | 611 (84.6) | 111 (15.4) | 722   | 0.053             |
|                  | Pos   | 81 (77.1)  | 24 (22.9)  | 105   |                   |
| Ki67             | < 20% | 547 (87.3) | 82 (12.7)  | 629   | <b>&lt; 0.001</b> |
|                  | ≥ 20% | 140 (72.9) | 52 (27.1)  | 192   |                   |
| c-kit            | Neg   | 595 (83.7) | 116 (16.3) | 711   | 0.739             |
|                  | Pos   | 89 (82.4)  | 19(17.6)   | 108   |                   |
| P63              | Neg   | 668 (84.0) | 127 (16.0) | 795   | 0.077             |
|                  | Pos   | 20(71.4)   | 8 (28.6)   | 28    |                   |
| CK5/6            | Neg   | 658 (83.7) | 128 (16.3) | 786   | 0.729             |
|                  | Pos   | 31 (81.6)  | 7 (18.4)   | 38    |                   |
| CK14             | Neg   | 661 (83.8) | 128 (16.2) | 789   | 0.766             |
|                  | Pos   | 27 (81.8)  | 6 (18.2)   | 33    |                   |
| P-cadherin       | Neg   | 602 (84.9) | 107 (15.1) | 709   | <b>0.011</b>      |
|                  | Pos   | 78 (75.0)  | 26 (25.0)  | 104   |                   |
| CG               | Neg   | 651 (84.5) | 119 (15.5) | 770   | <b>0.007</b>      |
|                  | Pos   | 35 (70.0)  | 15 (30.0)  | 50    |                   |
| SYN              | Neg   | 601 (85.4) | 103 (14.6) | 704   | <b>0.001</b>      |
|                  | Pos   | 89 (73.6)  | 32 (26.4)  | 121   |                   |
| Sox2             | Neg   | 280 (82.8) | 58 (17.2)  | 338   | <b>0.013</b>      |
|                  | Pos   | 55 (70.5)  | 23 (29.5)  | 78    |                   |
